# Supplementary material for: Pharmacogene Variants Associated with Liver Transplant in a Twelve-Year Clinical Follow-Up
Source: MDPI journal article supplement (doi:10.3390/pharmaceutics14020354), 2022-02-03
Supplement: s1 [file s1]

# Supplementary Materials: Pharmacogene Variants Associated with Liver Transplant in a Twelve-Year Clinical Follow-Up

Luis Sendra, Gladys G. Olivera, Rafael López-Andújar, Cristina Serrano, Luis E. Rojas, Eva María Montalvá, María José Herrero and Salvador F. Aliño

**Table S1.** Patients' genotype and allele frequencies. Chi-square calculation for Hardy-Weinberg equilibrium comparing the observed vs the expected genotype frequencies was also calculated.

| Gene   | SNPs       | Genotype | Frequency in Re-<br>cipients (%) | Allele frequen-<br>cies | $\chi^2$ | Frequency in<br>Donors (%) | Allele fre-<br>quencies | $\chi^2$ |
|--------|------------|----------|----------------------------------|-------------------------|----------|----------------------------|-------------------------|----------|
| ABCB1  | rs1045642  | CC       | 22.78                            | (C) 49.37 <sup>†</sup>  | 0.40     | 26.58                      | (C) 54.43               | 1.51     |
|        |            | TC       | 53.16                            | (T) 50.63               |          | 55.70                      | (T) 45.57 <sup>†</sup>  |          |
|        |            | TT       | 24.05                            |                         |          | 17.72                      |                         |          |
| ABCB1  | rs1128503  | CC       | 21.52                            | (C) 52.53               | 5.94     | 34.18                      | (C) 56.96               | 0.50     |
|        |            | TC       | 62.03                            | (T) 47.47 <sup>†</sup>  |          | 45.57                      | (T) 43.04 <sup>†</sup>  |          |
|        |            | TT       | 16.46                            |                         |          | 20.25                      |                         |          |
| ABCB1  | rs2032582  | GG       | 29.11                            | (G) 56.96               | 1.85     | 39.24                      | (G) 63.29               | 0.12     |
|        |            | GT       | 55.70                            | (T) 43.04 <sup>†</sup>  |          | 48.10                      | (T) 36.71 <sup>†</sup>  |          |
|        |            | TT       | 15.19                            |                         |          | 12.66                      |                         |          |
| ABCB1  | rs229109   | AA       | 6.33                             | (A) 9.49 <sup>†</sup>   | 39.90    | 1.27                       | (A) 4.43 <sup>†</sup>   | 6.38     |
|        |            | GA       | 6.33                             | (G) 90.51               |          | 6.33                       | (G) 95.57               |          |
|        |            | GG       | 87.34                            |                         |          | 92.41                      |                         |          |
| ABCB1  | rs2235013  | AA       | 17.72                            | (A) 48.10 <sup>†</sup>  | 4.71     | 31.65                      | (A) 51.90               | 3.56     |
|        |            | GA       | 60.76                            | (G) 51.90               |          | 40.51                      | (G) 48.10 <sup>†</sup>  |          |
|        |            | GG       | 21.52                            |                         |          | 27.85                      |                         |          |
| ABCB1  | rs2235033  | CC       | 17.72                            | (C) 48.10 <sup>†</sup>  | 4.71     | 32.91                      | (C) 52.53               | 4.54     |
|        |            | TC       | 60.76                            | (T) 51.90               |          | 39.24                      | (T) 47.47 <sup>†</sup>  |          |
|        |            | TT       | 21.52                            |                         |          | 27.85                      |                         |          |
| ABCB1  | rs3213619  | CC       | 0.00                             | (C) 1.27 <sup>†</sup>   | 0.02     | 0.00                       | (C) 3.16 <sup>†</sup>   | 0.11     |
|        |            | CT       | 2.53                             | (T) 98.73               |          | 6.33                       | (T) 96.84               |          |
|        |            | TT       | 97.47                            |                         |          | 93.67                      |                         |          |
| ABCB1  | rs9282564  | AA       | 91.14                            | (A) 95.57               | 0.21     | 84.81                      | (A) 91.14               | 4.68     |
|        |            | AG       | 8.86                             | (G) 4.43 <sup>†</sup>   |          | 12.66                      | (G) 8.86 <sup>†</sup>   |          |
|        |            | GG       | 0.00                             |                         |          | 2.53                       |                         |          |
| ABCC2  | rs3740066  | CC       | 34.18                            | (C) 58.86               | 0.04     | 37.97                      | (C) 62.66               | 0.30     |
|        |            | CT       | 49.37                            | (T) 41.14 <sup>†</sup>  |          | 49.37                      | (T) 37.34 <sup>†</sup>  |          |
|        |            | TT       | 16.46                            |                         |          | 12.66                      |                         |          |
| ABCC2  | rs2273697  | AA       | 6.33                             | (A) 20.25 <sup>†</sup>  | 1.90     | 2.53                       | (A) 19.62 <sup>†</sup>  | 0.70     |
|        |            | GA       | 27.85                            | (G) 79.75               |          | 34.18                      | (G) 80.38               |          |
|        |            | GG       | 65.82                            |                         |          | 63.29                      |                         |          |
| ABCC2  | rs717620   | CC       | 59.49                            | (C) 77.85               | 0.41     | 63.29                      | (C) 78.48               | 1.01     |
|        |            | TC       | 36.71                            | (T) 22.15 <sup>†</sup>  |          | 30.38                      | (T) 21.52 <sup>†</sup>  |          |
|        |            | TT       | 3.80                             |                         |          | 6.33                       |                         |          |
| ABCG2  | rs2231137  | AA       | 0.00                             | (A) 6.33 <sup>†</sup>   | 0.46     | 1.27                       | (A) 7.59 <sup>†</sup>   | 0.96     |
|        |            | GA       | 12.66                            | (G) 93.67               |          | 12.66                      | (G) 92.41               |          |
|        |            | GG       | 87.34                            |                         |          | 86.08                      |                         |          |
| ABCG2  | rs2231142  | AA       | 0.00                             | (A) 6.33 <sup>†</sup>   | 0.46     | 1.27                       | (A) 5.06 <sup>†</sup>   | 4.41     |
|        |            | CA       | 12.66                            | (C) 93.67               |          | 7.59                       | (C) 94.94               |          |
|        |            | CC       | 87.34                            |                         |          | 91.14                      |                         |          |
| CYP3A4 | rs2740574  | AA       | 97.47                            | (A) 98.73               | 0.02     | 83.54                      | (A) 91.14               | 0.35     |
|        |            | GA       | 2.53                             | (G) 1.27 <sup>†</sup>   |          | 15.19                      | (G) 8.86 <sup>†</sup>   |          |
|        |            | GG       | 0.00                             |                         |          | 1.27                       |                         |          |
| CYP3A5 | rs10264272 | AA       | 0.00                             | (A) 0.00                | NA       | 0                          | (A) 0.63 <sup>†</sup>   | 0.00     |

|         |            |    |       |                        |       |       |                        |       |
|---------|------------|----|-------|------------------------|-------|-------|------------------------|-------|
|         |            | AG | 0.00  | (G) 100                |       | 1.27  | (G) 99.37              |       |
|         |            | GG | 100   |                        |       | 98.73 |                        |       |
| CYP3A5  | rs776746   | AA | 1.27  | (A) 8.23 <sup>†</sup>  | 0.61  | 1.27  | (A) 11.39 <sup>†</sup> | 0.00  |
|         |            | GA | 13.92 | (G) 91.77              |       | 20.25 | (G) 88.61              |       |
|         |            | GG | 84.81 |                        |       | 78.48 |                        |       |
| CYP2B6  | rs2279343  | AA | 45.57 | (A) 67.72              | 0.02  | 53.16 | (A) 72.78              | 0.01  |
|         |            | GA | 44.30 | (G) 32.28 <sup>†</sup> |       | 39.24 | (G) 27.22 <sup>†</sup> |       |
|         |            | GG | 10.13 |                        |       | 7.59  |                        |       |
| CYP2B6  | rs3745274  | GG | 0.00  | (G) 43.67 <sup>†</sup> | 60.11 | 0.00  | (G) 40.51 <sup>†</sup> | 46.36 |
|         |            | GT | 87.34 | (T) 56.33              |       | 81.01 | (T) 59.49              |       |
|         |            | TT | 12.66 |                        |       | 18.99 |                        |       |
| CYP2C9  | rs1799853  | CC | 79.75 | (C) 89.87              | 1.27  | 77.22 | (C) 88.61              | 1.65  |
|         |            | CT | 20.25 | (T) 10.13 <sup>†</sup> |       | 22.78 | (T) 11.39 <sup>†</sup> |       |
|         |            | TT | 0.00  |                        |       | 0.00  |                        |       |
| CYP2C9  | rs1057910  | AA | 92.41 | (A) 96.20              | 0.16  | 87.34 | (A) 91.77              | 17.08 |
|         |            | CA | 7.59  | (C) 3.80 <sup>†</sup>  |       | 8.86  | (C) 8.23 <sup>†</sup>  |       |
|         |            | CC | 0.00  |                        |       | 3.80  |                        |       |
| CYP2C19 | rs4244285  | AA | 2.53  | (A) 16.46 <sup>†</sup> | 0.02  | 3.80  | (A) 13.92 <sup>†</sup> | 2.40  |
|         |            | GA | 27.85 | (G) 83.54              |       | 20.25 | (G) 86.08              |       |
|         |            | GG | 69.62 |                        |       | 75.95 |                        |       |
| MTHFR   | rs1801131  | AA | 49.37 | (A) 68.99              | 0.69  | 64.56 | (A) 81.01              | 0.49  |
|         |            | CA | 39.24 | (C) 31.01 <sup>†</sup> |       | 32.91 | (C) 18.99 <sup>†</sup> |       |
|         |            | CC | 11.39 |                        |       | 2.53  |                        |       |
|         |            |    |       |                        |       |       |                        |       |
| MTHFR   | rs1801133  | CC | 44.30 | (C) 65.82              | 0.19  | 21.52 | (C) 53.80              | 8.92  |
|         |            | TC | 43.04 | (T) 34.18 <sup>†</sup> |       | 64.56 | (T) 46.20 <sup>†</sup> |       |
|         |            | TT | 12.66 |                        |       | 13.92 |                        |       |
| NOD2    | rs2066844  | CC | 88.61 | (C) 94.30              | 0.36  | 91.14 | (C) 95.57              | 0.21  |
|         |            | CT | 11.39 | (T) 5.70 <sup>†</sup>  |       | 8.86  | (T) 4.43 <sup>†</sup>  |       |
|         |            | TT | 0.00  |                        |       | 0.00  |                        |       |
| NOD2    | rs2066845  | CC | 0.00  | (C) 1.90 <sup>†</sup>  | 0.04  | 0.00  | (C) 1.90 <sup>†</sup>  | 0.04  |
|         |            | CG | 3.80  | (G) 98.10              |       | 3.80  | (G) 98.10              |       |
|         |            | GG | 96.20 |                        |       | 96.20 |                        |       |
| TPMT    | rs1142345  | AA | 88.61 | (A) 94.30              | 0.36  | 93.67 | (A) 96.84              | 0.11  |
|         |            | GA | 11.39 | (G) 5.70 <sup>†</sup>  |       | 6.33  | (G) 3.16 <sup>†</sup>  |       |
|         |            | GG | 0.00  |                        |       | 0.00  |                        |       |
| TPMT    | rs1800460  | AA | 0.00  | (A) 5.06 <sup>†</sup>  | 0.28  | 0.00  | (A) 2.53 <sup>†</sup>  | 0.07  |
|         |            | GA | 10.13 | (G) 94.94              |       | 5.06  | (G) 97.47              |       |
|         |            | GG | 89.87 |                        |       | 94.94 |                        |       |
| TPMT    | rs1800462  | CC | 0.00  | (C) 1.90 <sup>†</sup>  | 0.04  | 0.00  | (C) 1.90 <sup>†</sup>  | 0.04  |
|         |            | GC | 3.80  | (G) 98.10              |       | 3.80  | (G) 98.10              |       |
|         |            | GG | 96.20 |                        |       | 96.20 |                        |       |
| SLCO1A2 | rs11568563 | AA | 81.01 | (A) 90.51              | 1.10  | 83.54 | (A) 91.77              | 0.80  |
|         |            | CA | 18.99 | (C) 9.49 <sup>†</sup>  |       | 16.46 | (C) 8.23 <sup>†</sup>  |       |
|         |            | CC | 0.00  |                        |       | 0.00  |                        |       |
| SLCO1B1 | rs2306283  | AA | 54.43 | (A) 70.89              | 4.11  | 40.51 | (A) 63.92              | 0.02  |
|         |            | AG | 32.91 | (G) 29.11 <sup>†</sup> |       | 46.84 | (G) 36.08 <sup>†</sup> |       |
|         |            | GG | 12.66 |                        |       | 12.66 |                        |       |
| SLCO1B1 | rs4149056  | CC | 1.27  | (C) 13.92 <sup>†</sup> | 0.32  | 3.80  | (C) 15.19 <sup>†</sup> | 1.34  |
|         |            | TC | 25.32 | (T) 86.08              |       | 22.78 | (T) 84.81              |       |
|         |            | TT | 73.42 |                        |       | 73.42 |                        |       |
| UGT1A9  | rs6714486  | AA | 0.00  | (A) 5.70 <sup>†</sup>  | 0.36  | 0.00  | (A) 4.43 <sup>†</sup>  | 0.21  |
|         |            | TA | 11.39 | (T) 94.30              |       | 8.86  | (T) 95.57              |       |
|         |            | TT | 88.61 |                        |       | 91.14 |                        |       |
| UGT1A9  | rs7251330  | CC | 0.00  | (C) 3.80 <sup>†</sup>  | 0.16  | 0.00  | (C) 4.43 <sup>†</sup>  | 0.21  |
|         |            | TC | 7.59  | (T) 96.20              |       | 8.86  | (T) 95.57              |       |
|         |            | TT | 92.41 |                        |       | 91.14 |                        |       |

<sup>†</sup>MAF (minor allele frequency);  $\chi^2$ : chi-square test result (Hardy Weinberg equilibrium while  $\chi^2 < 5.99$ ).
